# Supplementary material for: Protein kinase STK25 aggravates the severity of non-alcoholic fatty pancreas disease in mice
Source: PubMed Central journal article supplement (PMC5510597; doi:10.1530/joe-17-0018), 2017-04-25
Supplement: joe-234-15-s001.pdf [file joe-234-15-s001.pdf]

# ESM Figure 1

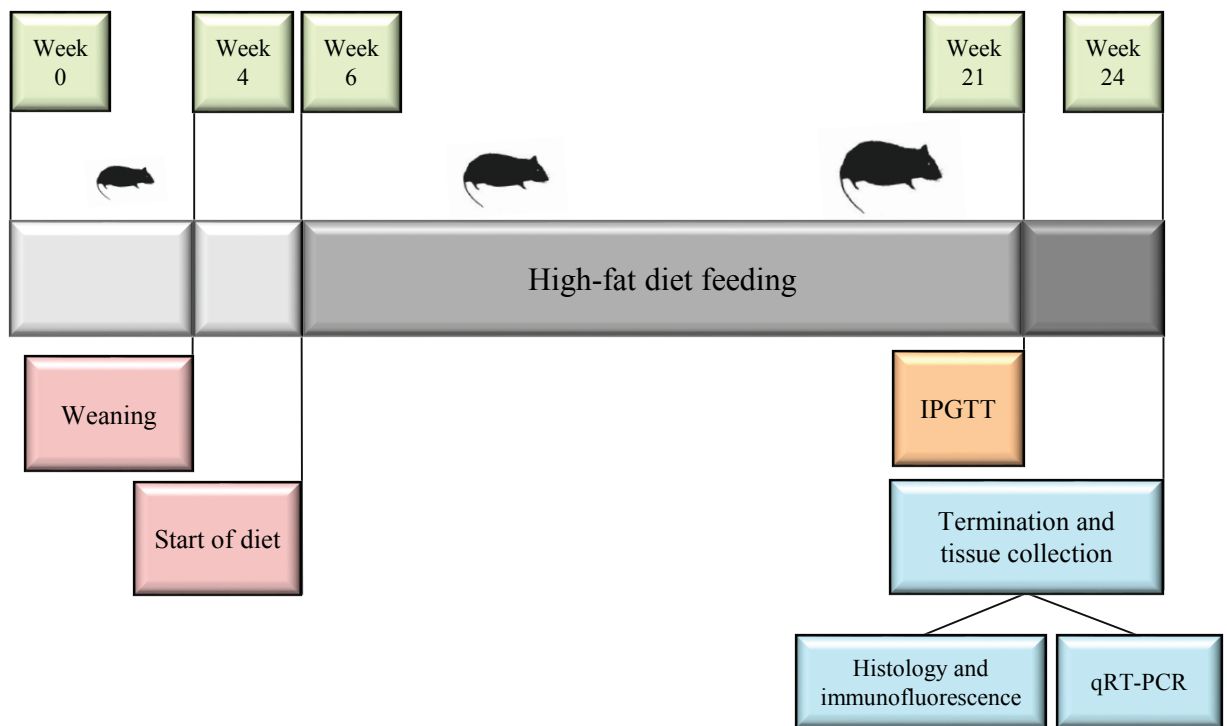

**ESM Figure 1.** Schematic presentation of measurements performed in high-fat-fed *Stk25* transgenic and wild-type mice. IPGTT, intraperitoneal glucose tolerance test; qRT-PCR, quantitative real-time PCR.
