# Supplementary material for: Protein kinase STK25 aggravates the severity of non-alcoholic fatty pancreas disease in mice
Source: PubMed Central journal article supplement (PMC5510597; doi:10.1530/joe-17-0018), 2017-04-25
Supplement: joe-234-15-s003.pdf [file joe-234-15-s003.pdf]

# ESM Figure 3

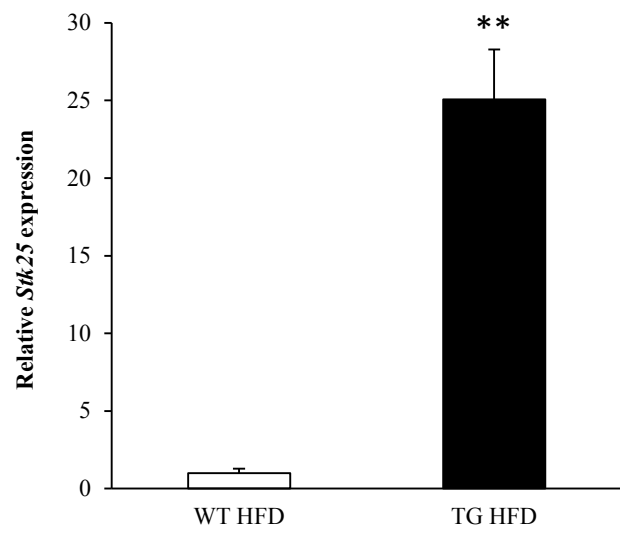

**ESM Figure 3.** Measurement of mRNA expression in pancreatic islets isolated from high-fat-fed *Stk25* transgenic and wild-type mice. Pancreatic islets were incubated overnight at 37°C in RPMI 1640 medium containing 11 mM glucose, followed by 60 min incubation in RPMI 1640 medium containing 5.5 mM glucose. Relative mRNA expression was assessed by quantitative real-time PCR. The expression level in wild-type mice is set to 1. Data are mean ± SEM from 4-5 mice per genotype. \*\**p* < 0.001. HFD, high-fat diet; TG, transgenic; WT, wild-type.
