# Supplementary material for: Protein kinase STK25 aggravates the severity of non-alcoholic fatty pancreas disease in mice
Source: PubMed Central journal article supplement (PMC5510597; doi:10.1530/joe-17-0018), 2017-04-25
Supplement: joe-234-15-s004.pdf [file joe-234-15-s004.pdf]

## ESM Figure 4

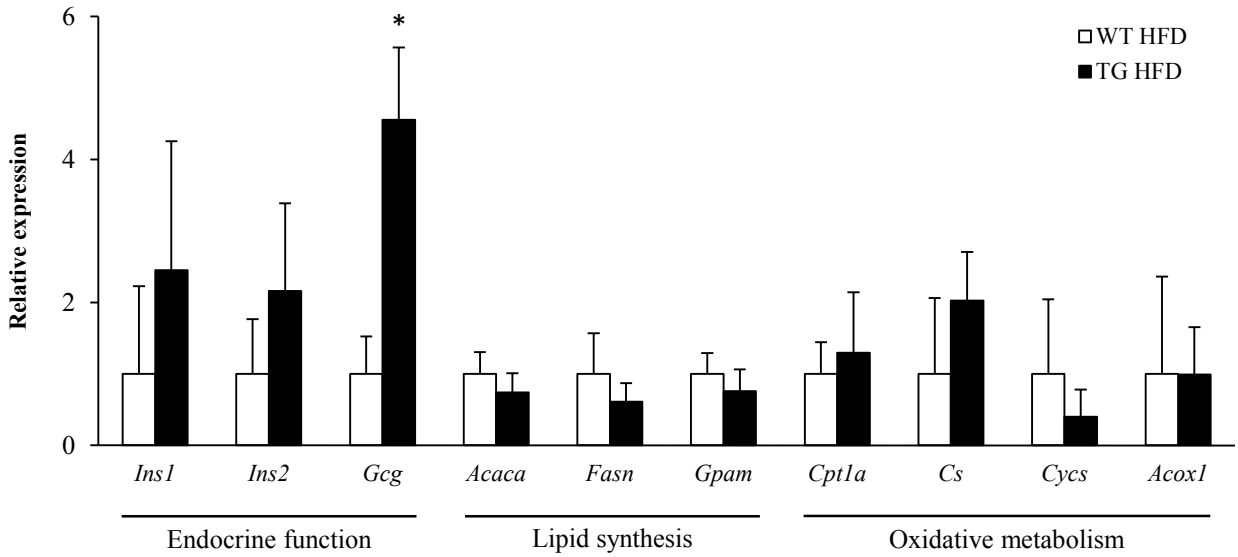

**ESM Figure 4.** Measurement of mRNA expression in pancreatic extracts of high-fat-fed *Stk25* transgenic and wild-type mice. Relative mRNA expression was assessed by quantitative real-time PCR. The expression level of each gene in wild-type mice is set to 1. The gene functions are indicated at the bottom. Data are mean  $\pm$  SEM from 7-12 mice per genotype. \* $p < 0.05$ .
