# Supplementary material for: Protein kinase STK25 aggravates the severity of non-alcoholic fatty pancreas disease in mice
Source: PubMed Central journal article supplement (PMC5510597; doi:10.1530/joe-17-0018), 2017-04-25
Supplement: joe-234-15-s005.pdf [file joe-234-15-s005.pdf]

## ESM Figure 5

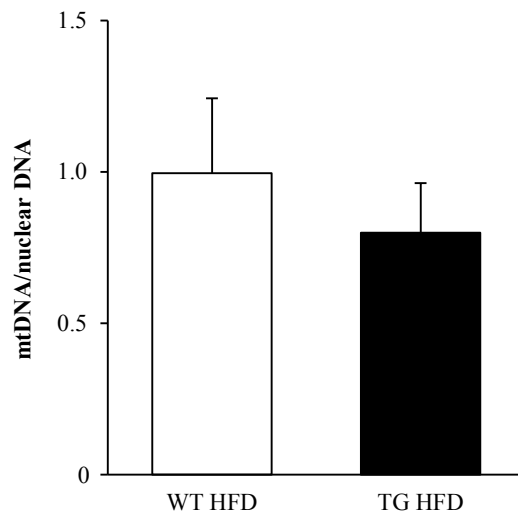

**ESM Figure 5.** Measurement of mtDNA content in pancreatic extracts of high-fat-fed *Stk25* transgenic and wild-type mice. Relative mtDNA content was calculated as the ratio of a mitochondrial-encoded gene (*Cox1*, forward 5'-ACTATACTACTACTAACAGACCG-3', reverse 5'-GGTTCTTTTTTCCGGAGTA-3') to a nuclear-encoded gene (*Cyclophilin A*, forward 5'-ACACGCCATAATGGCACTGG-3', reverse 5'-CAGTCTTGGCAGTGCAGAT-3') DNA levels, determined by quantitative real-time PCR. The mtDNA content in wild-type mice is set to 1. Data are mean  $\pm$  SEM from 10 mice per genotype. HFD, high-fat diet; TG, transgenic; WT, wild-type.
