# Supplementary material for: Protein kinase STK25 aggravates the severity of non-alcoholic fatty pancreas disease in mice
Source: PubMed Central journal article supplement (PMC5510597; doi:10.1530/joe-17-0018), 2017-04-25
Supplement: joe-234-15-s006.pdf [file joe-234-15-s006.pdf]

# ESM Figure 6

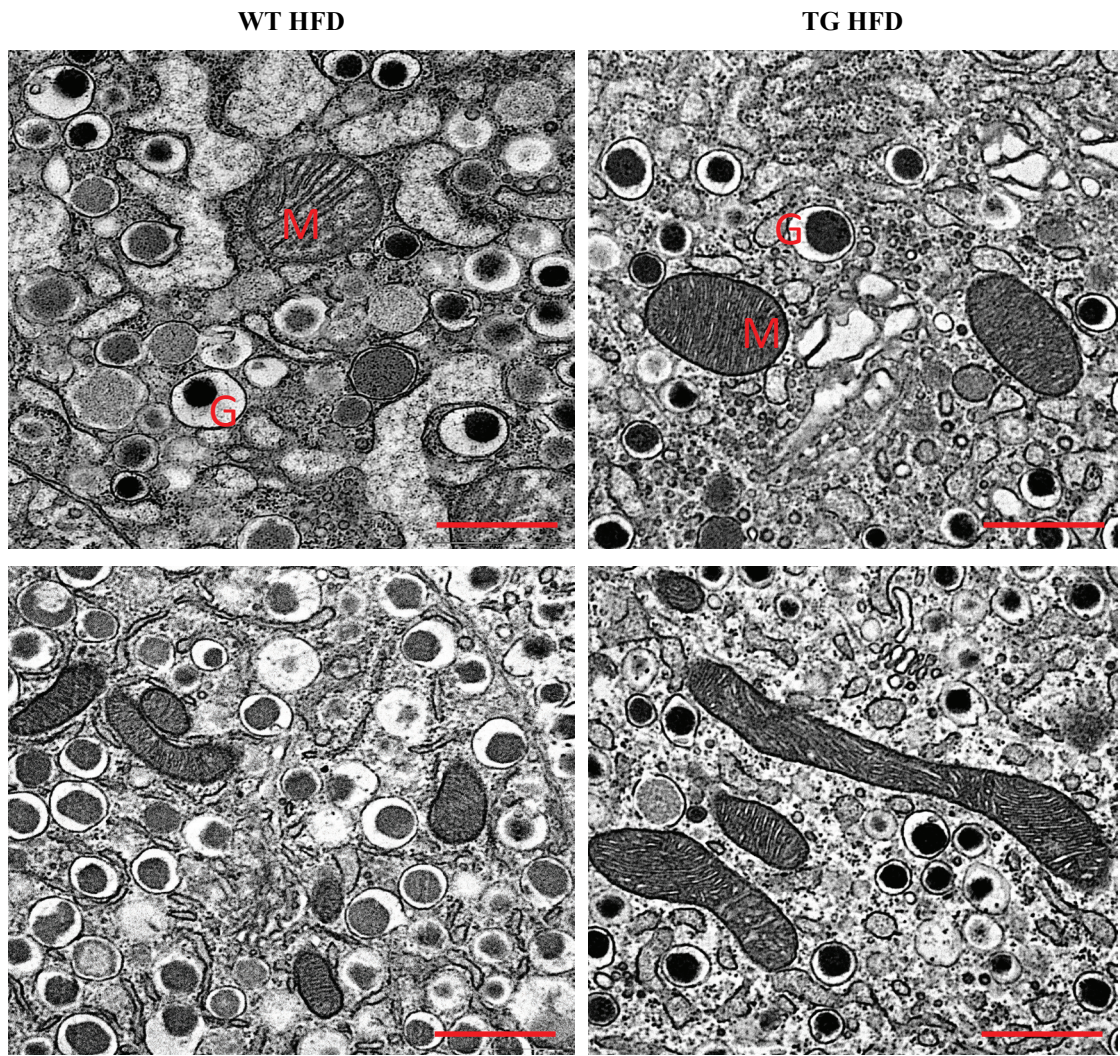

**ESM Figure 6.** Representative transmission electron microscopy images of the pancreatic islets of high-fat-fed *Stk25* transgenic and wild-type mice. Scale bars, 1  $\mu\text{m}$ . G, insulin granules; HFD, high-fat diet; M, mitochondria; TG, transgenic; WT, wild type.
