# Supplementary material for: Protein kinase STK25 aggravates the severity of non-alcoholic fatty pancreas disease in mice
Source: PubMed Central journal article supplement (PMC5510597; doi:10.1530/joe-17-0018), 2017-04-25
Supplement: joe-234-15-s008.pdf [file joe-234-15-s008.pdf]

# ESM Figure 8

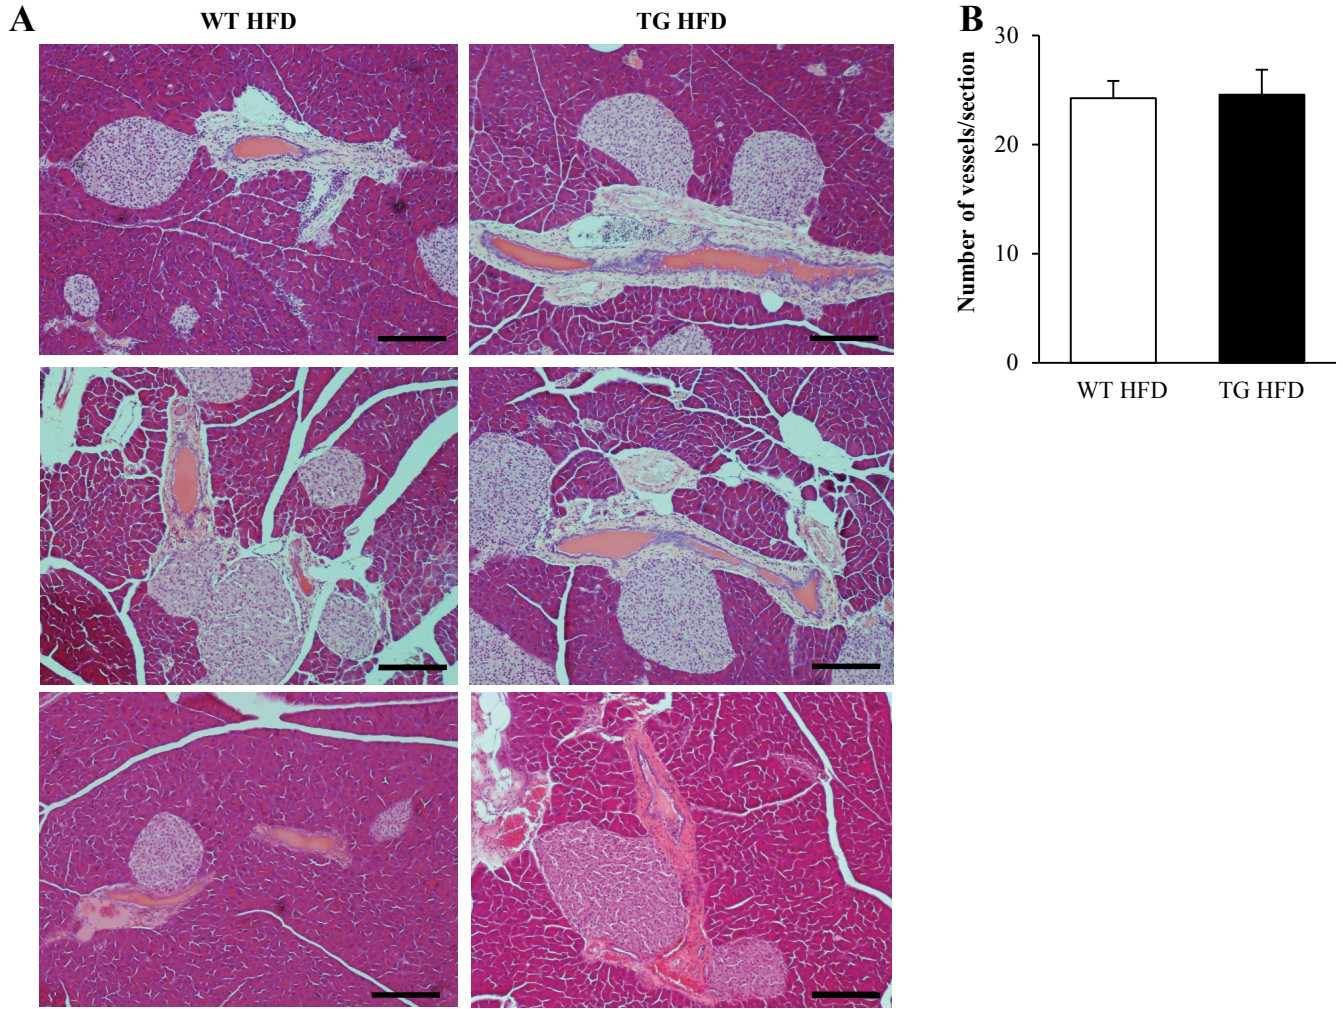

**ESM Figure 8.** Quantification of the number of vessels in the pancreatic tissue of high-fat-fed *Stk25* transgenic and wild-type mice. *A*: Representative images stained with H-E. Scale bars, 50  $\mu$ m. *B*: Quantification of the number of vessels. Data are mean  $\pm$  SEM from 6 mice per genotype. HFD, high-fat diet; TG, transgenic; WT, wild-type.
