# Supplementary material for: Protein kinase STK25 aggravates the severity of non-alcoholic fatty pancreas disease in mice
Source: PubMed Central journal article supplement (PMC5510597; doi:10.1530/joe-17-0018), 2017-04-25
Supplement: joe-234-15-s009.pdf [file joe-234-15-s009.pdf]

## ESM Figure 9

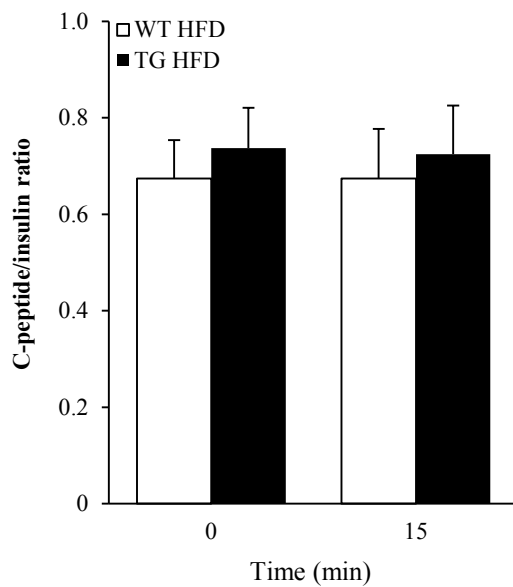

**ESM Figure 9.** C-peptide/insulin ratio assessed during IPGTT in high-fat-fed *Stk25* transgenic and wild-type mice. The levels were measured in plasma collected during the experiment shown in Fig. 6. Data are mean  $\pm$  SEM from 12-13 mice per genotype. HFD, high-fat diet; TG, transgenic; WT, wild-type.
