# Supplementary material for: Protein kinase STK25 aggravates the severity of non-alcoholic fatty pancreas disease in mice
Source: PubMed Central journal article supplement (PMC5510597; doi:10.1530/joe-17-0018), 2017-04-25
Supplement: joe-234-15-t001.pdf [file joe-234-15-t001.pdf]

**ESM Table 1.** List of antibodies used for immunofluorescence

| <b>Type</b>        | <b>Antibody name and catalogue number</b> | <b>Working dilution</b> | <b>Company</b>                         |
|--------------------|-------------------------------------------|-------------------------|----------------------------------------|
| Primary antibody   | anti-glucagon (#G2654)                    | 1:1000                  | Sigma-Aldrich (St. Louis, MO, USA)     |
|                    | anti-insulin (#ab7842)                    | 1:800                   | Abcam (Cambridge, UK)                  |
|                    | anti- $\alpha$ -SMA (#ab5694)             | 1:50                    | Abcam                                  |
|                    | anti-Ly6C (anti-Gr1; #ab15627)            | 1:500                   | Abcam                                  |
|                    | anti-STK25 (#NBP1-32670)                  | 1:300                   | Novus Biologicals (Littleton, CO, USA) |
| Secondary antibody | donkey anti-rabbit (#A21207)              | 1:1000                  | Invitrogen (Carlsbad, California, USA) |
|                    | donkey anti-mouse (#A21203)               | 1:1500                  | Invitrogen                             |
|                    | goat anti-guinea pig (#A11073)            | 1:1500                  | Invitrogen                             |
|                    | goat anti-rat (#A11007)                   | 1:600                   | Invitrogen                             |
