# Supplementary material for: Protein kinase STK25 aggravates the severity of non-alcoholic fatty pancreas disease in mice
Source: PubMed Central journal article supplement (PMC5510597; doi:10.1530/joe-17-0018), 2017-04-25
Supplement: joe-234-15-t002.pdf [file joe-234-15-t002.pdf]

**ESM Table 2.** Sequences of custom-designed primers (forward and reverse) and probes used for quantitative real-time PCR

| Gene        |         | Sequence (5'-3')        |
|-------------|---------|-------------------------|
| <i>Cycs</i> | Forward | GGACCAAATCTCCACGGTCT    |
|             | Reverse | CCCCAGGTGATGCCTTTGT     |
|             | Probe   | AGCCTGGCCTGTCTTCCGCCC   |
| <i>Fasn</i> | Forward | CTTAGCAGAGATCCCGAGACG   |
|             | Reverse | GGTCCTTTGAAGTCGAAGAAGAA |
|             | Probe   | TGGGCTACAGCATGGTGGGCTG  |
